# Supplementary material for: Supporting evidence for a human reservoir of invasive non-Typhoidal Salmonella from household samples in Burkina Faso
Source: PubMed Central journal article supplement (PMC6812844; doi:10.1371/journal.pntd.0007782), 2019-10-14

Tree scale: 10

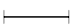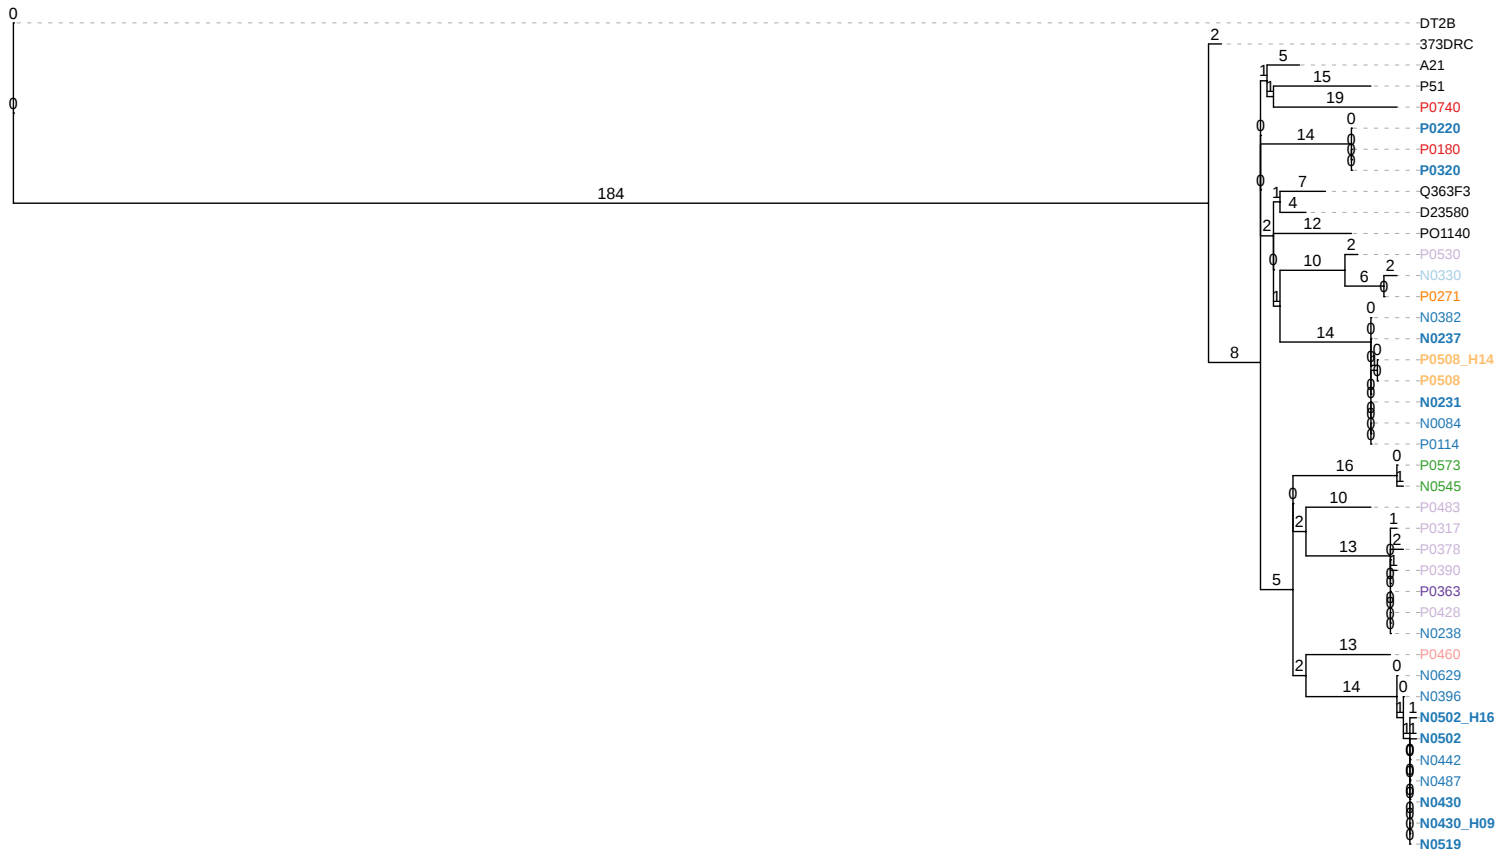

Supplement: pntd.0007782.s002.pdf [file pntd.0007782.s002.pdf]
